# Supplementary material
Source: ML conference proceedings conference paper supplement (https://openreview.net/forum?id=ailBXlahg7)
Supplement: supplementary_material [file attachment]

# Supplementary Materials for SSUL: Semantic Segmentation with Unknown Label for Exemplar-based Class-Incremental Learning

Anonymous Author(s)

Affiliation

Address

email

## 1 Additional Experimental Details

### 1.1 The details on datasets

**Pascal VOC 2012** consists of 13,487 images, and it is divided as 10,582 images for training, 1,449 images for validation and 1,456 images for test dataset. **ADE20K** is a large scale dataset for semantic segmentation of scenes, including 25,210 images. It is also grouped as 20,210 images for the training set, 2,000 images for the validation set, and 3,000 images for the testing set. As stated in the manuscript, we followed exactly same experimental settings with PLOP [2].

## 2 The More Details of Experiments on Pascal VOC 2012

### 2.1 The details of experimental results of Pascal VOC 2012

|                        | bg    | aero  | bike  | bird  | boat  | bottle | bus   | car   | cat   | chair | cow   | table | dog   | horse | mbike | person | plant | sheep | sofa  | train | tv    | mIoU  |
|------------------------|-------|-------|-------|-------|-------|--------|-------|-------|-------|-------|-------|-------|-------|-------|-------|--------|-------|-------|-------|-------|-------|-------|
| <b>10-1 (11 tasks)</b> |       |       |       |       |       |        |       |       |       |       |       |       |       |       |       |        |       |       |       |       |       |       |
| SSUL                   | 83.22 | 88.43 | 39.48 | 86.07 | 68.54 | 82.81  | 84.41 | 88.96 | 86.15 | 36.37 | 67.16 | 20.20 | 65.95 | 32.44 | 59.14 | 80.28  | 26.19 | 36.89 | 18.79 | 38.93 | 32.53 | 58.23 |
| SSUL-M                 | 86.73 | 90.36 | 39.53 | 87.72 | 68.36 | 81.94  | 89.81 | 89.27 | 86.44 | 35.15 | 67.41 | 27.65 | 69.54 | 46.99 | 67.80 | 80.70  | 25.93 | 43.11 | 23.77 | 56.97 | 46.34 | 62.45 |
| <b>15-1 (6 tasks)</b>  |       |       |       |       |       |        |       |       |       |       |       |       |       |       |       |        |       |       |       |       |       |       |
| SSUL                   | 85.86 | 90.06 | 41.63 | 88.74 | 69.94 | 79.35  | 90.44 | 88.85 | 92.76 | 36.84 | 78.21 | 59.53 | 90.49 | 87.66 | 82.54 | 86.14  | 28.44 | 44.45 | 17.65 | 31.97 | 20.21 | 66.27 |
| SSUL-M                 | 89.49 | 90.23 | 39.95 | 89.41 | 71.97 | 80.10  | 93.79 | 88.00 | 93.08 | 36.86 | 81.43 | 59.41 | 90.33 | 86.97 | 85.97 | 85.89  | 29.86 | 58.64 | 23.76 | 61.90 | 45.16 | 70.58 |
| <b>5-3 (6 tasks)</b>   |       |       |       |       |       |        |       |       |       |       |       |       |       |       |       |        |       |       |       |       |       |       |
| SSUL                   | 86.49 | 73.10 | 37.84 | 85.10 | 65.05 | 79.49  | 41.21 | 59.68 | 67.67 | 12.58 | 43.94 | 37.13 | 61.67 | 35.69 | 61.22 | 78.54  | 35.61 | 46.74 | 21.00 | 34.18 | 43.85 | 52.75 |
| SSUL-M                 | 88.35 | 80.21 | 37.13 | 84.98 | 66.68 | 80.12  | 58.45 | 64.79 | 66.72 | 14.45 | 48.51 | 38.88 | 61.87 | 33.32 | 65.88 | 77.90  | 33.54 | 46.96 | 24.77 | 50.02 | 49.31 | 55.85 |

Table 1: Details of Pascal VOC 2012.

Table 1 shows the summarized results of Pascal VOC 2012 by each class name.

### 2.2 The details of experimental results of class orderings

| 15-1 (6 tasks) | Class Ordering |       |       |       |       |       |       |       |       |       |       |       |       |       |       |       |       |       |       |       |
|----------------|----------------|-------|-------|-------|-------|-------|-------|-------|-------|-------|-------|-------|-------|-------|-------|-------|-------|-------|-------|-------|
|                | 1              | 2     | 3     | 4     | 5     | 6     | 7     | 8     | 9     | 10    | 11    | 12    | 13    | 14    | 15    | 16    | 17    | 18    | 19    | 20    |
| SSUL           |                |       |       |       |       |       |       |       |       |       |       |       |       |       |       |       |       |       |       |       |
| 1-15           | 78.06          | 74.46 | 73.32 | 75.45 | 77.43 | 71.72 | 76.56 | 81.50 | 75.06 | 74.19 | 76.94 | 80.30 | 78.69 | 78.30 | 72.72 | 77.65 | 74.83 | 75.29 | 74.71 | 74.11 |
| 16-20          | 28.54          | 29.25 | 23.48 | 38.03 | 34.54 | 32.83 | 18.97 | 20.23 | 36.35 | 23.02 | 30.50 | 35.21 | 40.31 | 15.88 | 37.26 | 27.44 | 26.35 | 27.25 | 46.56 | 50.66 |
| all            | 66.27          | 63.70 | 61.45 | 66.54 | 67.22 | 62.46 | 62.85 | 66.91 | 65.84 | 62.00 | 65.88 | 69.57 | 69.55 | 63.44 | 64.28 | 65.70 | 63.29 | 63.85 | 68.00 | 68.53 |
| SSUL-M         |                |       |       |       |       |       |       |       |       |       |       |       |       |       |       |       |       |       |       |       |
| 1-15           | 78.92          | 75.25 | 74.25 | 76.82 | 78.39 | 72.89 | 77.25 | 81.99 | 75.59 | 74.25 | 77.31 | 80.07 | 78.56 | 78.73 | 75.30 | 78.25 | 76.27 | 75.49 | 74.59 | 74.17 |
| 16-20          | 43.86          | 46.26 | 54.53 | 61.88 | 51.93 | 60.00 | 39.09 | 36.11 | 54.23 | 54.08 | 44.70 | 43.90 | 48.91 | 38.27 | 52.98 | 44.28 | 55.42 | 52.62 | 51.23 | 58.45 |
| all            | 70.58          | 68.35 | 69.55 | 73.27 | 72.09 | 69.82 | 68.16 | 71.06 | 70.51 | 69.43 | 69.55 | 71.46 | 71.50 | 69.10 | 69.98 | 70.17 | 71.30 | 70.05 | 69.03 | 70.42 |

Table 2: Details of class orderings.

Table 2 shows the numerical details for SSUL and SSUL-M of Figure 3(b) in the manuscript. Note that we strictly followed the class orderings of Pascal VOC 2012 as done in PLOP [2]:

### 14 3 The Additional Experimental Results on ADE20K

#### 15 3.1 Comparison with the jointly trained model in "ADE 100-5" and "ADE 100-10"

Table 3: Experimental results on ADE20K.

| Method   | ADE 100-5 (11 tasks) |              |              | ADE 100-10 (6 tasks) |              |              |
|----------|----------------------|--------------|--------------|----------------------|--------------|--------------|
|          | 0-100                | 101-150      | all          | 0-100                | 101-150      | all          |
| ILT [3]  | 0.08                 | 1.31         | 0.49         | 0.11                 | 3.06         | 1.09         |
| MiB [1]  | 36.01                | 5.66         | 25.96        | 38.21                | 11.12        | 29.24        |
| PLOP [2] | 39.11                | 7.81         | 28.75        | 40.48                | 13.61        | 31.59        |
| SSUL     | <b>42.03</b>         | <b>15.80</b> | <b>33.35</b> | <b>42.10</b>         | <b>16.02</b> | <b>33.46</b> |
| SSUL-M   | <b>42.53</b>         | <b>15.85</b> | <b>34.00</b> | <b>42.17</b>         | <b>16.03</b> | <b>33.89</b> |
| Joint    | 44.30                | 28.20        | 38.90        | 44.30                | 28.20        | 38.90        |

16 To show the competitiveness of our proposed methods (SSUL and SSUL-M), we additionally trained  
 17 "Joint" as an upper bound of CISS in ADE20K. Table 3 shows the experimental results of "Joint"  
 18 with other baselines (the result of "ADE 100-5" and "ADE 100-10" for other baselines is exactly  
 19 same with Table 2 in the manuscript). We clearly observe that the performance of SSUL and SSUL-M  
 20 is not only overwhelming the performance of other baselines, but also nearly catching up with the  
 21 upper bound.

#### 22 3.2 Experimental results on the simple task sequence scenario

Table 4: Experimental results on ADE20K. SSUL-M denotes the result using exemplar memory.

| Method   | ADE 100-50 (2 tasks) |         |       |
|----------|----------------------|---------|-------|
|          | 0-100                | 101-150 | all   |
| ILT [3]  | 18.29                | 14.40   | 17.00 |
| MiB [1]  | 40.52                | 17.17   | 32.79 |
| PLOP [2] | 41.87                | 14.89   | 32.94 |
| SSUL     | 42.13                | 13.32   | 32.59 |
| SSUL-M   | 42.20                | 13.95   | 32.80 |
| Joint    | 44.30                | 28.20   | 38.90 |

23 Table 4 shows the experimental results on "ADE 50-50". Note that it is not practical and the more  
 24 simple scenario than others in the manuscript. Note that SSUL and SSUL-M also achieves almost  
 25 competitive compared to other baselines.

### 3.3 Analysis of Qualitative Results

In Figure 1, we visualized the qualitative results from ADE20K 100-10 (6 tasks) scenario. We argue that we seldom suffer from the background semantic shift issue on ADE20K because its clear and dense labels for both things and stuff. Consequently, the false-positive predictions are noticeably reduced compared to the results on Pascal VOC 2012. As in Figure 1, the *unknown* label (*i.e.*, *black* pixels) is correctly transformed to the label to be learned in the future (*e.g.*, *fan* in step-5 and *plate* in step-6) while keeping the previously learned knowledge.

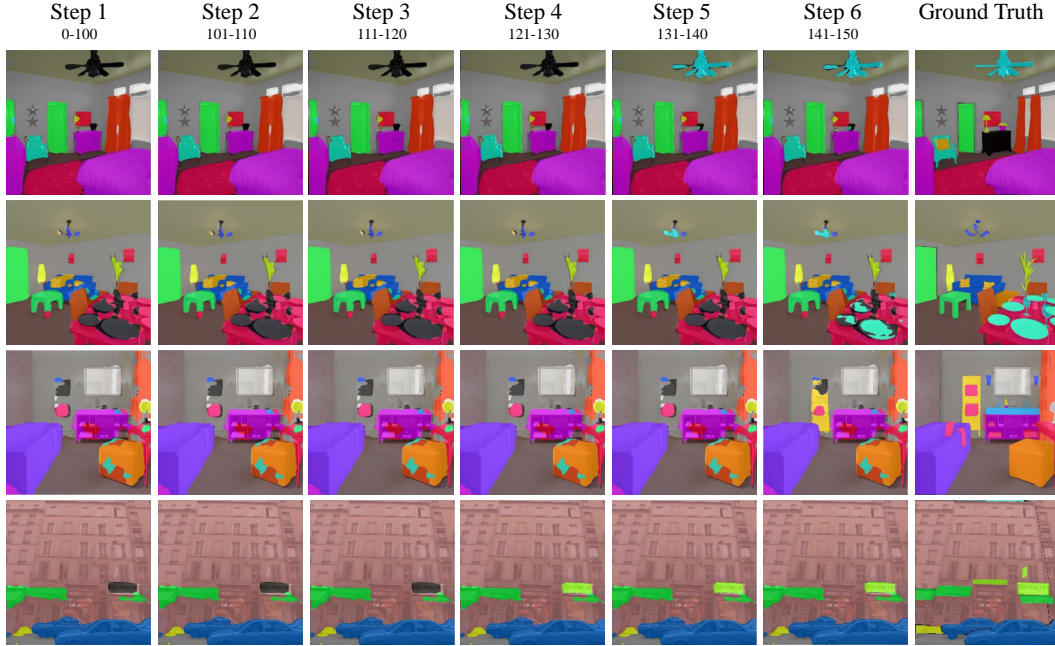

Figure 1: Qualitative results of SSUL-M on ADE20K.

## 33 **References**

- 34 [1] Fabio Cermelli, Massimiliano Mancini, Samuel Rota Buló, Elisa Ricci, and Barbara Caputo. Modeling the  
35 background for incremental learning in semantic segmentation. In *Proceedings of the IEEE/CVF Conference*  
36 *on Computer Vision and Pattern Recognition*, pages 9233–9242, 2020.
- 37 [2] Arthur Douillard, Yifu Chen, Arnaud Dapogny, and Matthieu Cord. Plop: Learning without forgetting for  
38 continual semantic segmentation. *arXiv preprint arXiv:2011.11390*, 2020.
- 39 [3] Umberto Michieli and Pietro Zanuttigh. Incremental learning techniques for semantic segmentation. In  
40 *Proceedings of the IEEE/CVF International Conference on Computer Vision Workshops*, pages 0–0, 2019.
